# Supplementary material
Source: publisher site journal article supplement (https://www.dovepress.com/article/397735)
Supplement: Supplementary file 1 [file get_supplementary_file.php]

**Supplementary table 1:** Human resources available in obstetric ward of JUMC

| Human resources | Number of available in labor unit | Number of available in Operation unit | Number of available in maternity unit | Total |
| --- | --- | --- | --- | --- |
| Health care providers at obstetric ward | | | | |
| Diploma Nurse | NA | 3 | NA | 3 |
| Bachelor of science in Nurse | NA | 10 | NA | 10 |
| Bachelor of science in Midwives | 28 | 7 | 22 | 57 |
| Obstetricians | 1 | 1 | 1 | 3 |
| Residents | 7 | 6 | 8 | 21 |
| Medical interns | 10 | 2 | 10 | 22 |
| Anesthetist | NA | 6 | NA | 6 |
| Total subtotal | 46 | 35 | 41 | 122 |
| Number of Supportive staffs at obstetric ward | | | | |
| Cleaner | 18 | 10 | 15 | 43 |
| Runner | 6 | 2 | 3 | 11 |
| Porter | 3 | 6 | 2 | 11 |
| Guard | 9 | 3 | 2 | 14 |
| Subtotal | 38 | 21 | 22 | 79 |
| Overall total | 84 | 56 | 63 | 201 |

Key NA= Not applicable

**Supplementary table 2**: Infrastructure available at obstetric ward of JUMC

| Infrastructure | Number |
| --- | --- |
| Total number of available rooms in the ward | 12 |
| Total number of available beds | 62 |
| Total number of toilets | 52 |
| Electric power | Continuously available with power back up |
| Water | Available with frequent interruption in all rooms |
| Shower | 6 (one is not functional) |

**Supplementary table 3:** Inventory checked at obstetric ward (labor, operational room and maternity unity) at JMC

| **S.no** | **Drugs and equipment for delivery service** | **Available at the time of observation(N=3)** | **Available in the last six months with or without stock out** |
| --- | --- | --- | --- |
| 01 | Oxytocin/ Ergometrine |  | Available |
| 02 | Magnesium sulphate /diazepam |  | Available |
| 03 | Antihypertensive (Nifedipine and Hydralazine) |  | Available |
| 04 | 40% glucose |  | Stocked out for 20 days |
| 05 | Lidocaine |  | available |
| 06 | Tetracycline eye ointment |  | available |
| 07 | Atropine |  | available |
| 08 | Hydrocortisone |  | available |
| 09 | Ca gluconate |  | available |
| 10 | Adrenaline |  | available |
| 11 | Aminophylline |  | Not used currently |
| 12 | Dexamethasone |  | Stocked out for 10 days |
| 13 | Misoprostol & mifepristone |  | available |
| 14 | Ceftriaxone |  | Stocked out for 12 |
| 15 | TDF/3TC/EFV (ARV drugs) |  | available |
| 16 | Nevirapine syrup |  | available |
| 17 | Oxygen |  | available |
| 18 | Tetracycline eye ointment |  | available |
| 19 | Vitamin K |  | available |
| 20 | Ephedrine injection |  | available |
| 21 | Ketamine injection |  | available |
| 22 | Oxygen inhalation |  | available |
| 23 | Thiopental iv |  | available |
| 24 | Halothane |  | available |
| 25 | Muscle relaxant (Suxamethonium & Vecuronium) |  | available |
| 26 | Lidocaine injection and or Bupivacaine |  | available |
| 27 | Lidocaine + epinephrine injection |  | available |
| 28 | Spinal Needle |  | available |
| 29 | IV fluids (crystalloids) |  | stock out for 10 days |
| 30 | Sterile gloves |  | Stocked out for 4 days |
| 31 | IV Cannula |  | stock out for 3 days |
| 32 | IV sets |  | available |
| 33 | Syringe with needle |  | stock out for 4 days |
| 34 | HIV test kits |  | available |
| 35 | Delivery sets |  | 13delivery sets are available |
| 36 | Episiotomy sets |  | 13 episiotomy sets available |
| 37 | Craniotomy sets |  | 1 available |
| 38 | Sterile suture kit |  | available |
| 39 | B/P apparatus with cuff |  | 3 in maternity and 1 in labor ward |
| 40 | Stethoscope | Not available | Staffs used students’ thermometry |
| 41 | Thermometer | Not available | Staffs used students’ thermometry |
| 42 | Weight scale for baby |  | available |
| 43 | Urinary Catheter |  | stock out for 8 days |
| 44 | Ultra Sound |  | available |
| 45 | Suction machine portable |  | available |
| 47 | Radiant warmer |  | available |
| 48 | Vacuum extractor |  | available |
| 49 | Cord cutting/clumping set |  | available |
| 50 | Forceps |  | available |
| 51 | Suction bulb for newborn |  | available |
| 52 | IV stand |  | available |
| 53 | Sterilizer |  | available |
| 54 | Ambu-bag with sterile mask |  | available |
| 55 | Delivery coaches |  | 5 delivery coaches |
| 56 | C/S or maternity Operation table |  | 2 tables all days available |
| 57 | Nasal prong for oxygen |  | available |
| 58 | Mask for oxygen administration |  | available |
| 59 | Catheter for oxygen administration |  | available |
| 60 | Filled oxygen tank with flow meter |  | available |
| 61 | Stand lamp |  | available |
| 62 | Pantograph |  | available |
| 63 | Fetoscopy Doppler |  | available |
| 64 | Tape to measure baby length and Head circumference |  | available |
| 65 | Speculum for vaginal examination |  | available |
| 66 | Mask for staffs |  | available |
| 67 | Sanitizer |  | available |
| 68 | Towels for drying and wrapping |  | not available for 6 days |
| 69 | weighing scale for baby |  | available |
| 70 | Long sleeve glove for placenta removal |  | available |
| 71 | Functioning clock |  | available |
| 72 | Registration books |  | available |
| 73 | Reporting formats |  | available |
